# Supplementary material for: The Synthesis and Structure of a Scandium Nitrate Hydroxy-Bridged Dimeric Complex Supported by Bipyridyl Ligands
Source: MDPI journal article supplement (doi:10.3390/molecules27062024), 2022-03-21
Supplement: s1 [file s1]

## SUPPLEMENTARY MATERIALS

The Synthesis and Structure of a Scandium Nitrate Hydroxy-Bridged Dimeric Complex Supported by Bipyridyl Ligands

**Simon A. Cotton, Paul R. Raithby, Stephanie Schiffrers,  
Simon J. Teat and John E. Warren**

## **bath333n**

**Table S1 Crystal data and structure refinement for bath333n.**

|                                             |                                                                                |
|---------------------------------------------|--------------------------------------------------------------------------------|
| Identification code                         | bath333n                                                                       |
| Empirical formula                           | C <sub>20</sub> H <sub>18</sub> N <sub>8</sub> O <sub>14</sub> Sc <sub>2</sub> |
| Formula weight                              | 684.34                                                                         |
| Temperature/K                               | 150.15                                                                         |
| Crystal system                              | triclinic                                                                      |
| Space group                                 | P-1                                                                            |
| a/Å                                         | 8.059(2)                                                                       |
| b/Å                                         | 9.214(3)                                                                       |
| c/Å                                         | 10.025(3)                                                                      |
| α/°                                         | 72.191(3)                                                                      |
| β/°                                         | 69.448(3)                                                                      |
| γ/°                                         | 69.438(3)                                                                      |
| Volume/Å <sup>3</sup>                       | 638.4(3)                                                                       |
| Z                                           | 1                                                                              |
| ρ <sub>calc</sub> /cm <sup>3</sup>          | 1.780                                                                          |
| μ/mm <sup>-1</sup>                          | 0.578                                                                          |
| F(000)                                      | 348.0                                                                          |
| Crystal size/mm <sup>3</sup>                | 0.1 × 0.05 × 0.05                                                              |
| Radiation                                   | synchrotron (λ = 0.6911)                                                       |
| 2θ range for data collection/°              | 6.15 to 60.146                                                                 |
| Index ranges                                | -11 ≤ h ≤ 11, -13 ≤ k ≤ 13, -14 ≤ l ≤ 14                                       |
| Reflections collected                       | 7072                                                                           |
| Independent reflections                     | 3770 [R <sub>int</sub> = 0.0325, R <sub>sigma</sub> = 0.0498]                  |
| Data/restraints/parameters                  | 3770/0/203                                                                     |
| Goodness-of-fit on F <sup>2</sup>           | 1.044                                                                          |
| Final R indexes [I ≥ 2σ (I)]                | R <sub>1</sub> = 0.0534, wR <sub>2</sub> = 0.1609                              |
| Final R indexes [all data]                  | R <sub>1</sub> = 0.0625, wR <sub>2</sub> = 0.1704                              |
| Largest diff. peak/hole / e Å <sup>-3</sup> | 0.89/-0.51                                                                     |

**Table S2 Fractional Atomic Coordinates ( $\times 10^4$ ) and Equivalent Isotropic Displacement Parameters ( $\text{\AA}^2 \times 10^3$ ) for bath333n.  $U_{eq}$  is defined as 1/3 of the trace of the orthogonalised  $U_{ij}$  tensor.**

| Atom | <i>x</i>   | <i>y</i>    | <i>z</i>    | $U_{eq}$   |
|------|------------|-------------|-------------|------------|
| C1   | -268 (3)   | 3019 (3)    | 778 (2)     | 30.8 (4)   |
| C2   | -348 (3)   | 3254 (3)    | -632 (3)    | 35.9 (5)   |
| C3   | 754 (4)    | 2118 (3)    | -1430 (3)   | 40.1 (6)   |
| C4   | 1904 (4)   | 767 (3)     | -797 (3)    | 35.6 (5)   |
| C5   | 1915 (3)   | 604 (2)     | 622 (2)     | 25.7 (4)   |
| C6   | 3107 (3)   | -804 (2)    | 1370 (2)    | 25.3 (4)   |
| C7   | 4017 (3)   | -2162 (3)   | 800 (3)     | 34.6 (5)   |
| C8   | 5089 (3)   | -3436 (3)   | 1560 (3)    | 40.1 (5)   |
| C9   | 5280 (3)   | -3313 (3)   | 2822 (3)    | 37.9 (5)   |
| C10  | 4330 (3)   | -1921 (3)   | 3330 (3)    | 32.4 (4)   |
| N1   | 854 (2)    | 1727 (2)    | 1407.9 (19) | 25.2 (3)   |
| N2   | 3227 (2)   | -686 (2)    | 2635 (2)    | 27.0 (3)   |
| N3   | 4184 (2)   | 2238 (2)    | 3131 (2)    | 28.1 (4)   |
| N4   | -1136 (3)  | 3944 (2)    | 4793 (2)    | 29.6 (4)   |
| O1   | 3097 (2)   | 2803 (2)    | 2330.5 (18) | 31.5 (3)   |
| O2   | 3636 (2)   | 1328 (2)    | 4315.6 (19) | 35.0 (4)   |
| O3   | 5668 (2)   | 2519 (2)    | 2775 (2)    | 40.1 (4)   |
| O4   | 1171 (2)   | -502.9 (18) | 5666.9 (16) | 26.3 (3)   |
| O5   | -857 (2)   | 3793.8 (19) | 3511.4 (18) | 33.5 (4)   |
| O6   | -270 (3)   | 2755 (2)    | 5549 (2)    | 36.9 (4)   |
| O7   | -2156 (3)  | 5121 (2)    | 5244 (2)    | 41.3 (4)   |
| Sc1  | 1081.6 (5) | 1313.3 (4)  | 3801.5 (4)  | 22.46 (14) |

**Table S3 Anisotropic Displacement Parameters ( $\text{\AA}^2 \times 10^3$ ) for bath333n. The Anisotropic displacement factor exponent takes the form:  $-2\pi^2[h^2a^{*2}U_{11}+2hka^*b^*U_{12}+\dots]$ .**

| Atom | $U_{11}$  | $U_{22}$  | $U_{33}$  | $U_{23}$   | $U_{13}$   | $U_{12}$   |
|------|-----------|-----------|-----------|------------|------------|------------|
| C1   | 32.0 (10) | 32.7 (10) | 29.2 (10) | 0.3 (7)    | -16.7 (8)  | -7.9 (8)   |
| C2   | 39.0 (11) | 41.1 (12) | 30.2 (11) | 7.4 (9)    | -20.7 (9)  | -15.4 (10) |
| C3   | 48.7 (13) | 54.6 (15) | 24.7 (10) | 2.0 (9)    | -19.5 (10) | -22.4 (12) |
| C4   | 40.9 (12) | 46.2 (12) | 24.4 (10) | -7.5 (8)   | -10.9 (9)  | -15.3 (10) |
| C5   | 25.9 (8)  | 31.9 (9)  | 22.6 (9)  | -2.4 (7)   | -9.1 (7)   | -12.3 (7)  |
| C6   | 24.3 (8)  | 28.5 (9)  | 24.5 (9)  | -3.8 (7)   | -7.3 (7)   | -9.7 (7)   |
| C7   | 31.8 (10) | 38.4 (12) | 36.1 (12) | -14.5 (9)  | -7.4 (9)   | -8.6 (9)   |
| C8   | 31.4 (10) | 32.9 (11) | 52.9 (15) | -14.5 (10) | -9.1 (10)  | -2.8 (9)   |
| C9   | 28.8 (10) | 31.2 (11) | 47.1 (14) | -4.3 (9)   | -13.3 (9)  | -0.8 (8)   |
| C10  | 28.3 (9)  | 33.7 (10) | 34.3 (11) | -5.1 (8)   | -13.7 (8)  | -3.7 (8)   |
| N1   | 27.0 (8)  | 28.0 (8)  | 22.5 (7)  | -0.4 (6)   | -12.2 (6)  | -8.3 (6)   |
| N2   | 26.5 (8)  | 28.1 (8)  | 26.8 (8)  | -4.1 (6)   | -11.1 (7)  | -5.7 (6)   |
| N3   | 26.1 (8)  | 29.6 (8)  | 31.2 (9)  | -8.7 (6)   | -10.2 (7)  | -6.1 (6)   |
| N4   | 31.5 (8)  | 28.5 (8)  | 32.0 (9)  | -6.4 (6)   | -11.8 (7)  | -8.7 (7)   |

**Table S3 Anisotropic Displacement Parameters ( $\text{\AA}^2 \times 10^3$ ) for bath333n. The Anisotropic displacement factor exponent takes the form:  $-2\pi^2[h^2a^{*2}U_{11}+2hka^*b^*U_{12}+\dots]$ .**

| Atom | U <sub>11</sub> | U <sub>22</sub> | U <sub>33</sub> | U <sub>23</sub> | U <sub>13</sub> | U <sub>12</sub> |
|------|-----------------|-----------------|-----------------|-----------------|-----------------|-----------------|
| O1   | 34.6 (8)        | 35.2 (8)        | 27.4 (7)        | 0.9 (6)         | -14.5 (6)       | -12.8 (6)       |
| O2   | 37.9 (8)        | 36.4 (8)        | 36.4 (9)        | 3.1 (6)         | -21.2 (7)       | -15.0 (7)       |
| O3   | 30.8 (8)        | 48.8 (10)       | 46.7 (10)       | -11.3 (8)       | -11.2 (7)       | -16.2 (7)       |
| O4   | 28.0 (7)        | 30.3 (7)        | 22.6 (7)        | 1.1 (5)         | -13.1 (5)       | -9.9 (6)        |
| O5   | 40.3 (8)        | 29.7 (8)        | 25.6 (7)        | -4.6 (6)        | -12.6 (6)       | -1.4 (6)        |
| O6   | 47.7 (10)       | 32.7 (8)        | 35.0 (9)        | -6.7 (6)        | -21.8 (8)       | -6.5 (7)        |
| O7   | 42.8 (9)        | 34.9 (9)        | 46.6 (11)       | -18.8 (7)       | -9.1 (8)        | -5.2 (7)        |
| Sc1  | 24.2 (2)        | 23.9 (2)        | 19.9 (2)        | -1.21 (13)      | -10.03 (14)     | -6.09 (14)      |

**Table S4 Bond Lengths for bath333n.**

| Atom | Atom | Length/ $\text{\AA}$ | Atom | Atom             | Length/ $\text{\AA}$ |
|------|------|----------------------|------|------------------|----------------------|
| C1   | C2   | 1.384 (3)            | N3   | O2               | 1.261 (3)            |
| C1   | N1   | 1.348 (3)            | N3   | O3               | 1.219 (3)            |
| C2   | C3   | 1.373 (4)            | N3   | Sc1              | 2.719 (2)            |
| C3   | C4   | 1.389 (4)            | N4   | O5               | 1.267 (3)            |
| C4   | C5   | 1.388 (3)            | N4   | O6               | 1.261 (3)            |
| C5   | C6   | 1.485 (3)            | N4   | O7               | 1.212 (3)            |
| C5   | N1   | 1.351 (3)            | N4   | Sc1              | 2.691 (2)            |
| C6   | C7   | 1.389 (3)            | O1   | Sc1              | 2.3115 (17)          |
| C6   | N2   | 1.344 (3)            | O2   | Sc1              | 2.2958 (18)          |
| C7   | C8   | 1.381 (4)            | O4   | Sc1 <sup>1</sup> | 2.0413 (16)          |
| C8   | C9   | 1.369 (4)            | O4   | Sc1              | 2.0974 (15)          |
| C9   | C10  | 1.388 (3)            | O5   | Sc1              | 2.2702 (17)          |
| C10  | N2   | 1.346 (3)            | O6   | Sc1              | 2.2558 (19)          |
| N1   | Sc1  | 2.3744 (19)          | Sc1  | O4 <sup>1</sup>  | 2.0412 (16)          |
| N2   | Sc1  | 2.3261 (19)          | Sc1  | Sc1 <sup>1</sup> | 3.3372 (9)           |
| N3   | O1   | 1.265 (3)            |      |                  |                      |

<sup>1</sup>-X,-Y,1-Z

**Table S5 Bond Angles for bath333n.**

| Atom | Atom | Atom | Angle/ $^\circ$ | Atom | Atom | Atom             | Angle/ $^\circ$ |
|------|------|------|-----------------|------|------|------------------|-----------------|
| N1   | C1   | C2   | 123.1 (2)       | N4   | Sc1  | Sc1 <sup>1</sup> | 98.96 (5)       |
| C3   | C2   | C1   | 118.7 (2)       | O1   | Sc1  | N1               | 74.78 (6)       |
| C2   | C3   | C4   | 119.2 (2)       | O1   | Sc1  | N2               | 83.98 (7)       |
| C5   | C4   | C3   | 119.2 (2)       | O1   | Sc1  | N3               | 27.64 (6)       |
| C4   | C5   | C6   | 122.2 (2)       | O1   | Sc1  | N4               | 87.26 (6)       |
| N1   | C5   | C4   | 122.1 (2)       | O1   | Sc1  | Sc1 <sup>1</sup> | 168.01 (4)      |
| N1   | C5   | C6   | 115.70 (17)     | O2   | Sc1  | N1               | 124.04 (6)      |

**Table S5 Bond Angles for bath333n.**

| Atom             | Atom | Atom             | Angle/°     | Atom            | Atom | Atom             | Angle/°    |
|------------------|------|------------------|-------------|-----------------|------|------------------|------------|
| C7               | C6   | C5               | 121.7 (2)   | O2              | Sc1  | N2               | 81.61 (7)  |
| N2               | C6   | C5               | 115.82 (18) | O2              | Sc1  | N3               | 27.51 (6)  |
| N2               | C6   | C7               | 122.5 (2)   | O2              | Sc1  | N4               | 95.65 (7)  |
| C8               | C7   | C6               | 118.7 (2)   | O2              | Sc1  | O1               | 55.05 (6)  |
| C9               | C8   | C7               | 119.5 (2)   | O2              | Sc1  | Sc1 <sup>1</sup> | 113.80 (5) |
| C8               | C9   | C10              | 118.7 (2)   | O4              | Sc1  | N1               | 138.96 (6) |
| N2               | C10  | C9               | 122.7 (2)   | O4 <sup>1</sup> | Sc1  | N1               | 81.94 (6)  |
| C1               | N1   | C5               | 117.73 (18) | O4              | Sc1  | N2               | 82.84 (7)  |
| C1               | N1   | Sc1              | 124.05 (15) | O4 <sup>1</sup> | Sc1  | N2               | 97.61 (7)  |
| C5               | N1   | Sc1              | 118.22 (13) | O4              | Sc1  | N3               | 105.20 (6) |
| C6               | N2   | C10              | 117.74 (19) | O4 <sup>1</sup> | Sc1  | N3               | 177.09 (6) |
| C6               | N2   | Sc1              | 119.45 (14) | O4              | Sc1  | N4               | 105.27 (7) |
| C10              | N2   | Sc1              | 121.27 (15) | O4 <sup>1</sup> | Sc1  | N4               | 89.09 (6)  |
| O1               | N3   | Sc1              | 57.95 (10)  | O4 <sup>1</sup> | Sc1  | O1               | 154.43 (6) |
| O2               | N3   | O1               | 114.88 (18) | O4              | Sc1  | O1               | 132.73 (6) |
| O2               | N3   | Sc1              | 57.22 (11)  | O4 <sup>1</sup> | Sc1  | O2               | 150.51 (6) |
| O3               | N3   | O1               | 122.8 (2)   | O4              | Sc1  | O2               | 78.16 (6)  |
| O3               | N3   | O2               | 122.3 (2)   | O4 <sup>1</sup> | Sc1  | O4               | 72.52 (7)  |
| O3               | N3   | Sc1              | 173.56 (16) | O4              | Sc1  | O5               | 130.34 (6) |
| O5               | N4   | Sc1              | 57.20 (10)  | O4 <sup>1</sup> | Sc1  | O5               | 86.79 (7)  |
| O6               | N4   | O5               | 113.72 (18) | O4 <sup>1</sup> | Sc1  | O6               | 91.81 (7)  |
| O6               | N4   | Sc1              | 56.52 (11)  | O4              | Sc1  | O6               | 79.76 (7)  |
| O7               | N4   | O5               | 122.7 (2)   | O4              | Sc1  | Sc1 <sup>1</sup> | 35.69 (4)  |
| O7               | N4   | O6               | 123.6 (2)   | O4 <sup>1</sup> | Sc1  | Sc1 <sup>1</sup> | 36.83 (4)  |
| O7               | N4   | Sc1              | 179.04 (15) | O5              | Sc1  | N1               | 77.97 (6)  |
| N3               | O1   | Sc1              | 94.42 (12)  | O5              | Sc1  | N2               | 145.68 (6) |
| N3               | O2   | Sc1              | 95.27 (12)  | O5              | Sc1  | N3               | 96.10 (7)  |
| Sc1 <sup>1</sup> | O4   | Sc1              | 107.48 (7)  | O5              | Sc1  | N4               | 27.97 (6)  |
| N4               | O5   | Sc1              | 94.83 (12)  | O5              | Sc1  | O1               | 78.24 (7)  |
| N4               | O6   | Sc1              | 95.69 (13)  | O5              | Sc1  | O2               | 110.48 (7) |
| N1               | Sc1  | N3               | 98.99 (6)   | O5              | Sc1  | Sc1 <sup>1</sup> | 111.88 (5) |
| N1               | Sc1  | N4               | 105.89 (6)  | O6              | Sc1  | N1               | 133.63 (6) |
| N1               | Sc1  | Sc1 <sup>1</sup> | 112.84 (5)  | O6              | Sc1  | N2               | 156.71 (7) |
| N2               | Sc1  | N1               | 69.09 (6)   | O6              | Sc1  | N3               | 89.53 (7)  |
| N2               | Sc1  | N3               | 80.20 (6)   | O6              | Sc1  | N4               | 27.79 (6)  |
| N2               | Sc1  | N4               | 170.81 (6)  | O6              | Sc1  | O1               | 96.58 (7)  |
| N2               | Sc1  | Sc1 <sup>1</sup> | 90.16 (5)   | O6              | Sc1  | O2               | 79.77 (7)  |
| N3               | Sc1  | Sc1 <sup>1</sup> | 140.86 (4)  | O6              | Sc1  | O5               | 55.76 (6)  |
| N4               | Sc1  | N3               | 93.29 (6)   | O6              | Sc1  | Sc1 <sup>1</sup> | 84.70 (5)  |

<sup>1</sup>-X,-Y,1-Z

**Table S6 Hydrogen Bonds for bath333n.**

| D H A  | d(D-H)/Å | d(H-A)/Å | d(D-A)/Å  | D-H-A/° |
|--------|----------|----------|-----------|---------|
| C1H1O5 | 0.95     | 2.24     | 2.879 (3) | 123.7   |

**Table S7 Torsion Angles for bath333n.**

| A B C D   | Angle/°     | A B C D    | Angle/°     |
|-----------|-------------|------------|-------------|
| C1C2C3C4  | 0.4 (4)     | C7C6N2Sc1  | 163.51 (16) |
| C2C1N1C5  | -1.3 (3)    | C7C8C9C10  | 2.4 (4)     |
| C2C1N1Sc1 | 178.45 (17) | C8C9C10N2  | 0.0 (4)     |
| C2C3C4C5  | -0.3 (4)    | C9C10N2C6  | -2.4 (3)    |
| C3C4C5C6  | -179.9 (2)  | C9C10N2Sc1 | 163.35 (18) |
| C3C4C5N1  | -0.6 (3)    | N1C1C2C3   | 0.4 (4)     |
| C4C5C6C7  | -12.2 (3)   | N1C5C6C7   | 168.47 (19) |
| C4C5C6N2  | 168.7 (2)   | N1C5C6N2   | -10.7 (3)   |
| C4C5N1C1  | 1.4 (3)     | N2C6C7C8   | -0.2 (3)    |
| C4C5N1Sc1 | 178.36 (16) | O1N3O2Sc1  | 5.99 (19)   |
| C5C6C7C8  | -179.3 (2)  | O2N3O1Sc1  | -5.94 (19)  |
| C5C6N2C10 | 178.37 (18) | O3N3O1Sc1  | 172.42 (19) |
| C5C6N2Sc1 | 15.6 (2)    | O3N3O2Sc1  | 172.38 (18) |
| C6C5N1C1  | 179.23 (18) | O5N4O6Sc1  | -0.44 (19)  |
| C6C5N1Sc1 | 1.0 (2)     | O6N4O5Sc1  | 0.44 (19)   |
| C6C7C8C9  | -2.3 (4)    | O7N4O5Sc1  | 178.86 (19) |
| C7C6N2C10 | 2.5 (3)     | O7N4O6Sc1  | 178.85 (19) |

**Table S8 Hydrogen Atom Coordinates (Å×10<sup>4</sup>) and Isotropic Displacement Parameters (Å<sup>2</sup>×10<sup>3</sup>) for bath333n.**

| Atom | x         | y         | z         | U(eq)  |
|------|-----------|-----------|-----------|--------|
| H1   | -1039     | 3805      | 1328      | 37     |
| H2   | -1152     | 4184      | -1040     | 43     |
| H3   | 731       | 2254      | -2402     | 48     |
| H4   | 2673      | -35       | -1330     | 43     |
| H7   | 3905      | -2214     | -96       | 42     |
| H8   | 5689      | -4392     | 1209      | 48     |
| H9   | 6049      | -4163     | 3339      | 45     |
| H10  | 4465      | -1838     | 4206      | 39     |
| H4A  | 2070 (40) | -910 (40) | 6120 (40) | 35 (8) |

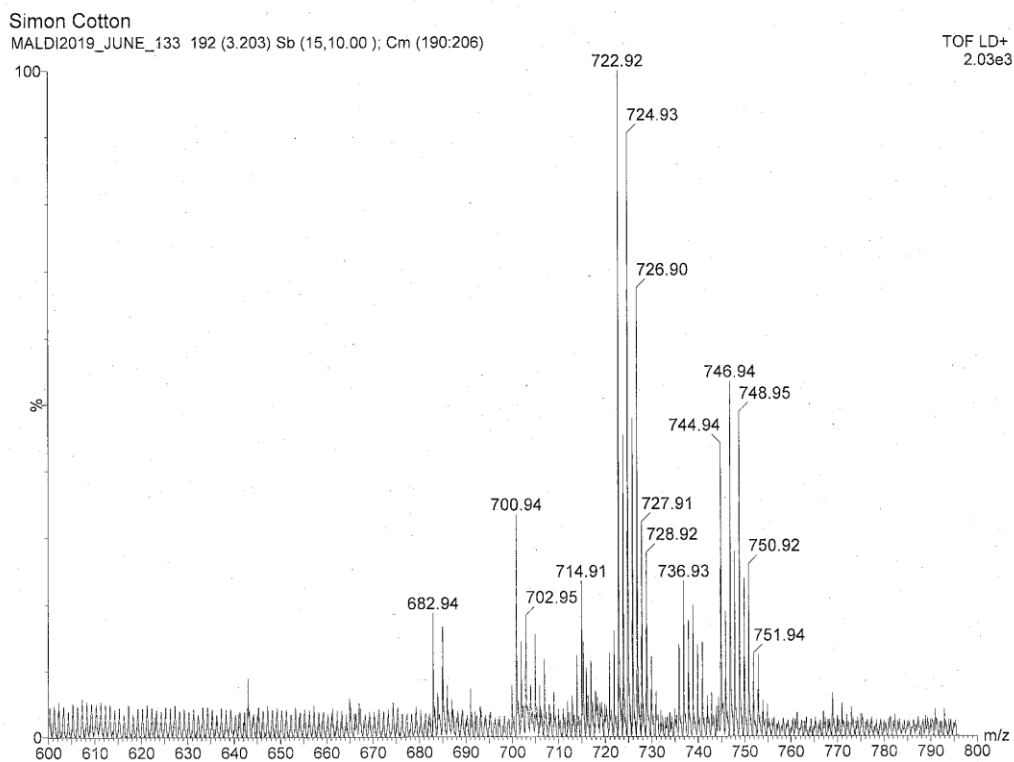

Figure S1 (a) MALDI Mass spectrum of  $[(\text{bipy})(\text{NO}_3)_2\text{Sc}(\mu\text{-OH})_2\text{Sc}(\text{NO}_3)_2(\text{bipy})]$ .

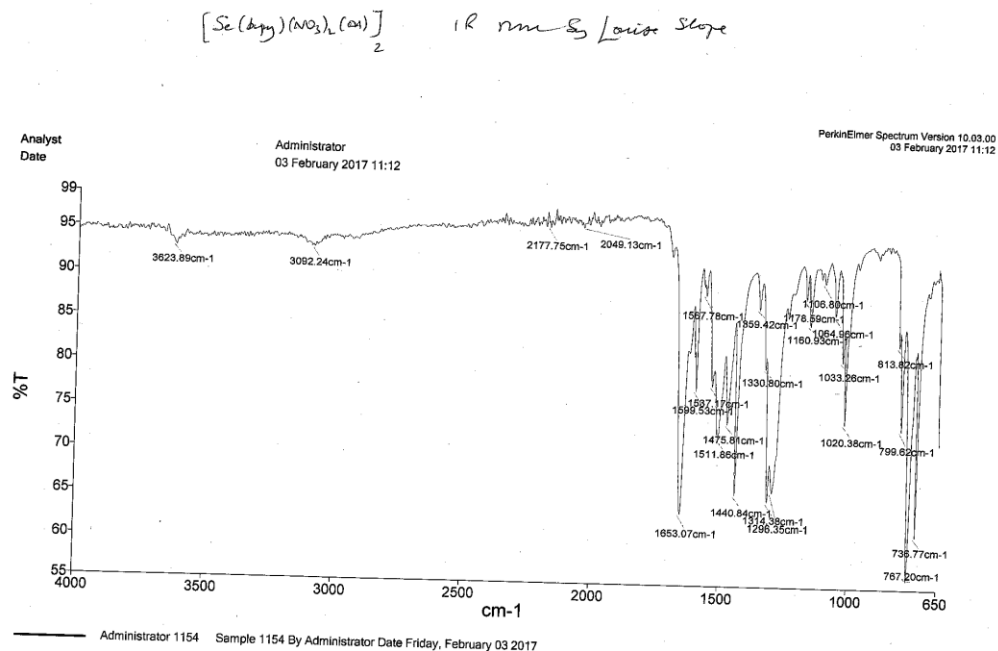

Figure S1 (b) Solid state IR spectrum of  $[(\text{bipy})(\text{NO}_3)_2\text{Sc}(\mu\text{-OH})_2\text{Sc}(\text{NO}_3)_2(\text{bipy})]$ .

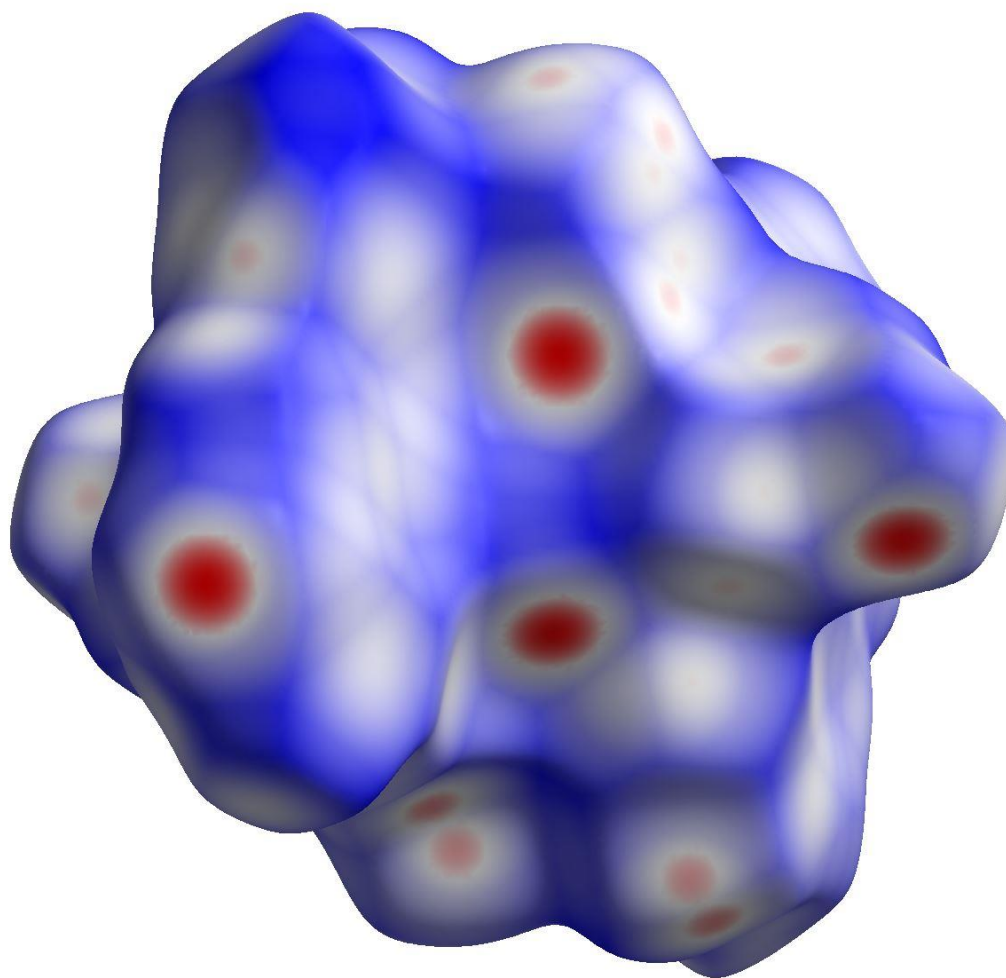

Figure S2. Surface plot of D-norm surface -0\_3117\_1\_0733.

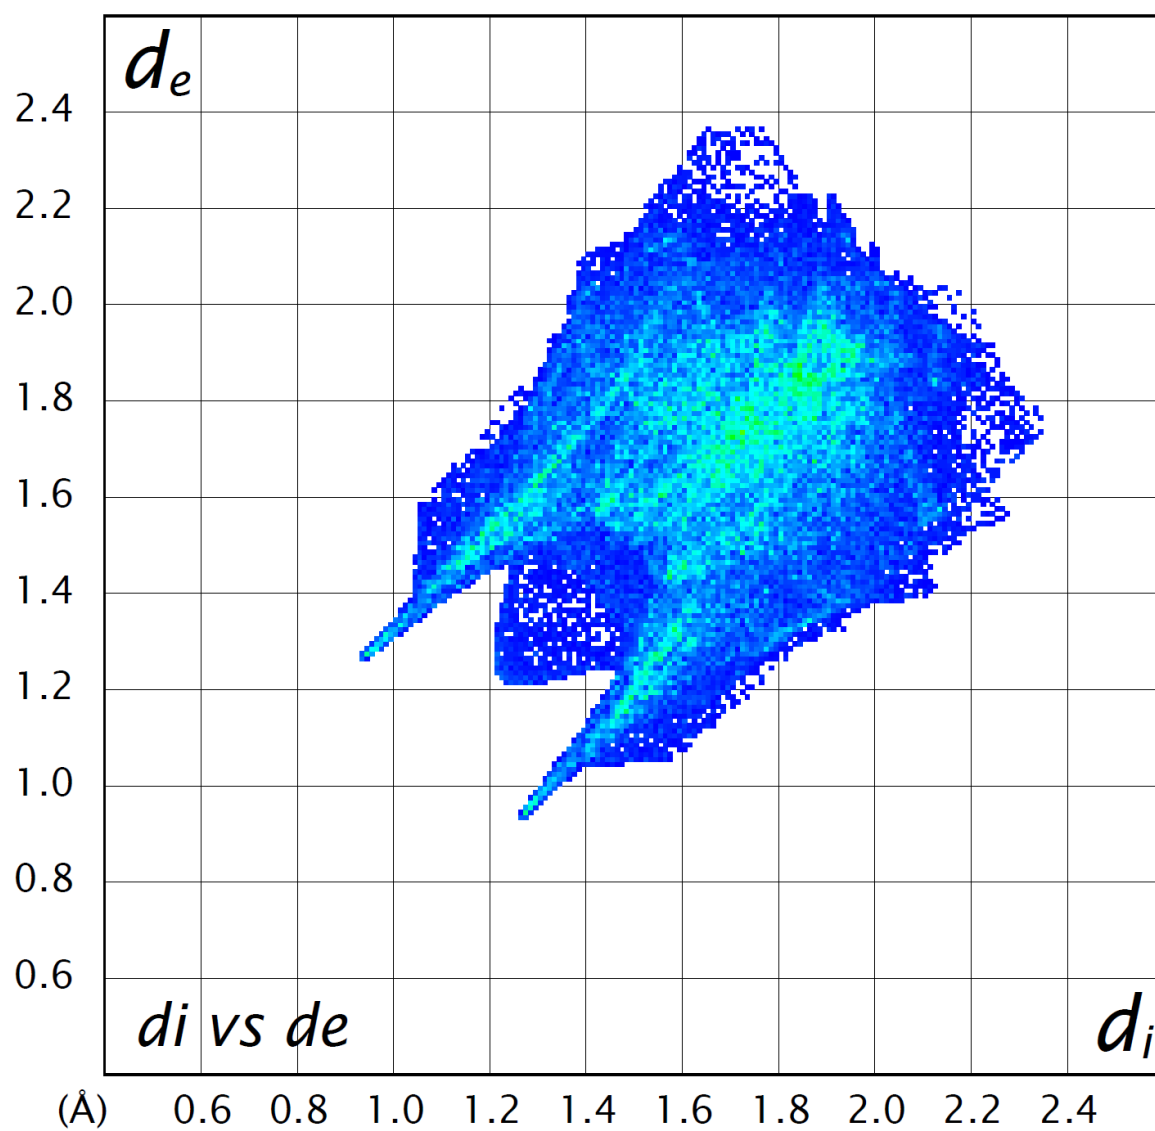

Figure S3. Fingerprint plot showing the presence of hydrogen bonding.

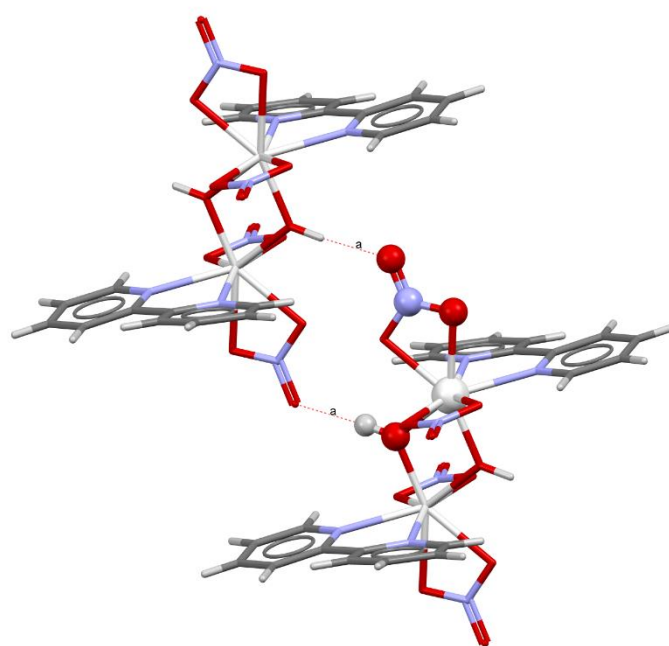

Figure S4. Packing plot showing the H-hydrogen bonding interactions and the presence of the R2,2(12) rings.
